# Supplementary material for: Mesoporous MnOx–CeO2 composites for NH3-SCR: the effect of preparation methods and a third dopant
Source: Royal Society of Chemistry journal article supplement (doi:10.1039/c9ra00731h), 2019-01-01
Supplement: c9ra00731h1.pdf [file c9ra00731h1.pdf]

### *Supporting information*

#### **Mesoporous MnO<sub>x</sub>-CeO<sub>2</sub> composites for NH<sub>3</sub>-SCR: the effect of preparation method and a third dopant**

Li Weiman<sup>1,2,3,4</sup>, Liu Haidi<sup>1</sup>, Chen Yunfa<sup>1,4</sup> \*

1 State Key Laboratory of Multi-phase Complex Systems, Institute of Process Engineering, Chinese Academy of Sciences, Beijing 100190, China

2 University of Chinese Academy of Sciences, No. 19A Yuquan Road, Beijing 100049, China

3 Zhongke Langfang Institute of Process Engineering, Fenghua Road No 1, Langfang Economic & Technical Development Zone, Hebei Province, China

4 CAS Center for Excellence in Urban Atmospheric Environment, Xiamen 361021, China

\* Corresponding author. E-mail address: chenyf@ipe.ac.cn.

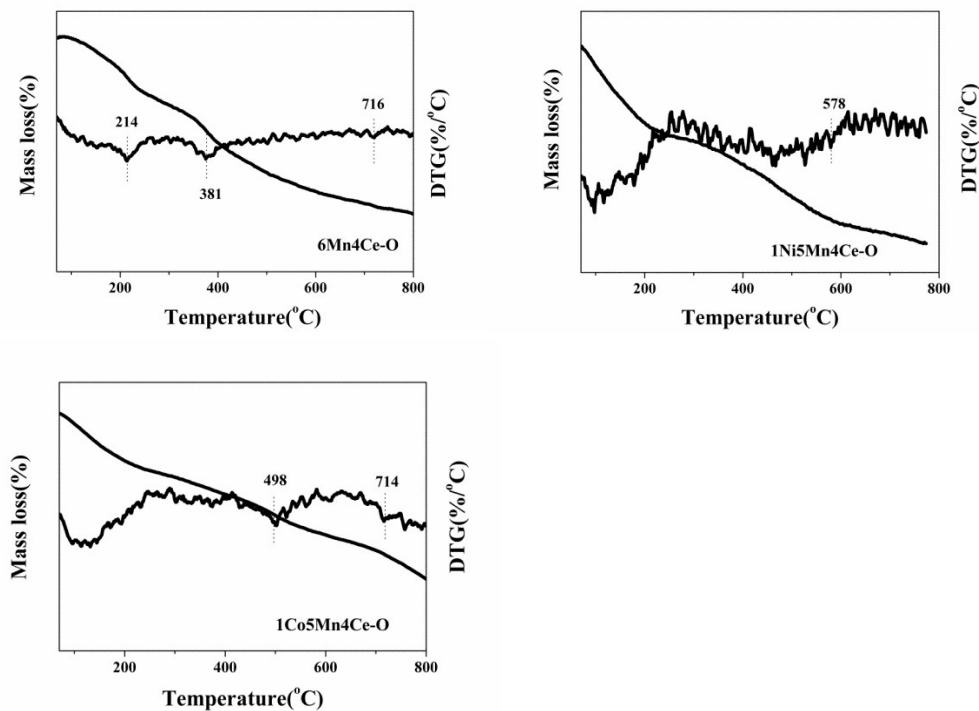

Fig.S1 TG/DTG results of samples from an oxalate route

TG analysis was performed in air (100ml/min) on a NETZSCH STA 449 Thermal analysis instrument. In each experiment, 20mg sample was placed on an  $\text{Al}_2\text{O}_3$  pan from 30-800°C with a heating rate of 10°C/min. The TG/DTG curves of three samples were shown in Fig.S1.

The weight loss before 200°C was due to water adsorbed on the surface of catalysts, indicating the samples can easily lose the adsorbed water. A weight loss of 6Mn4Ce at 214°C may be due to the decomposition of surface ammonium sulfate[1]. The weight loss of 6Mn4Ce and 1Co5Mn4Ce at 716°C and 714°C may be caused by decomposition of metal sulfates on catalyst's surface[2]. There was no related peak on 1Ni5Mn4Ce, indicating introduction of nickel could inhibit the formation of metal sulphates. The result is consistent with  $\text{SO}_2$ -TPD.

1. Jia B, Guo J, Luo H, Shu S, Fang N, Li J, (2018) Study of NO removal and resistance to  $\text{SO}_2$  and  $\text{H}_2\text{O}$  of  $\text{MnOx}/\text{TiO}_2$ ,  $\text{MnOx}/\text{ZrO}_2$  and  $\text{MnOx}/\text{ZrO}_2\text{-TiO}_2$ . *Applied Catalysis A: General* 553:82-90
2. Zhang P, Sun Y, Su W, Wei Y, Liu J, (2016) Low-temperature selective catalytic reduction of NO with  $\text{NH}_3$  over Ni-Mn-Ox catalysts. *RSC Advances* 6:107270-107277
